# Supplementary material for: Unlocking the Zn storage performance of ammonium vanadate nanoflowers as high-capacity cathodes for aqueous zinc-ion batteries via potassium ion and ethylene glycol co-intercalation engineering
Source: Royal Society of Chemistry journal article supplement (doi:10.1039/d4ta04112g), 2024-01-01
Supplement: d4ta04112g1.pdf [file d4ta04112g1.pdf]

## Supporting Information

1

2

3 **Unlocking Zn Storage Performance of Ammonium Vanadate Nanoflowers as**  
4 **High-Capacity Cathodes for Aqueous Zinc-ion Batteries via Potassium Ion and**  
5 **Ethylene Glycol Co-Intercalation Engineering**

6

7 Ji Chen<sup>a,#</sup>, Xiaoyue Zhang<sup>b,#</sup>, Yangjie Li<sup>a</sup>, Xiaoying Li<sup>a</sup>, Xiaoqin Zhang<sup>a</sup>, Yuxiang  
8 Chen<sup>a</sup>, Qiaoji Zheng<sup>a</sup>, Xingqiao Wu<sup>b</sup>, Heng Zhang<sup>c,\*</sup>, Xin Tan<sup>b,\*</sup>, Dunmin Lin<sup>a,\*</sup>

9 <sup>a</sup>College of Chemistry and Materials Science, Sichuan Normal University, Chengdu  
10 610066, China

11 <sup>b</sup>Institute for Carbon Neutralization Technology, College of Chemistry and Materials  
12 Engineering, Wenzhou University, Wenzhou.

13 <sup>c</sup>School of Materials Science and Engineering, Suzhou University of Science and  
14 Technology, Suzhou 215009, China.

15

16

17

18

19

## 20 **Experimental**

---

<sup>#</sup>These authors contributed equally

<sup>\*</sup>Corresponding authors: Email: zhangheng@usts.edu.cn (Heng Zhang); xintan@wzu.edu.cn (Xin Tan); ddmd222@sicnu.edu.cn (Dunmin Lin); Fax: +86 28 84760802; Tel: +86 28 84760802

1 *Chemicals*: The compounds used included ammonium metavanadate ( $\text{NH}_4\text{VO}_3$ ,  
2 Aladdin Biochemical Technology Co., Ltd., >99%), oxalic acid dihydrate  
3 ( $\text{H}_2\text{C}_2\text{O}_4 \cdot \text{H}_2\text{O}$ , Sinopharm Chemical Reagent Co., Ltd., >99%), ethylene glycol  
4 ( $\text{C}_2\text{H}_6\text{O}_2$ , Aladdin Biochemical Technology Co., Ltd., >99%) and potassium sulfate  
5 (Shanghai Aladdin Biochemical Technology Co., Ltd., >99%). All the chemicals were  
6 used as received without further purification.

7

8 *Synthesis of K-NVO*: The K-intercalated  $\text{NH}_4\text{V}_4\text{O}_{10}$  was synthesized by a simple one-  
9 step hydrothermal reaction. In a typical synthesis, 0.354 g  $\text{NH}_4\text{VO}_3$  was added to 60 ml  
10 of distilled water and stirred for 1 h until completely dissolved. Then, 0.2835 g of  
11  $\text{H}_2\text{C}_2\text{O}_4 \cdot 2\text{H}_2\text{O}$  was added to the solution, and stirred until completely dissolved, and  
12 then 0.15 mmol of potassium sulfate was added. After that, the whole solution was  
13 transferred to a 100 mL PTFE-lined stainless-steel autoclave for a 24-hour reaction at  
14 180 °C. The powders were collected by centrifugation and washed 3 times with distilled  
15 water and absolute ethanol, and dried overnight in a vacuum oven at 60 °C.

16

17 *Synthesis of EG-NVO*: The EG-intercalated  $\text{NH}_4\text{V}_4\text{O}_{10}$  was synthesized by a simple  
18 one-step hydrothermal reaction. In a typical synthesis, 0.354 g  $\text{NH}_4\text{V}_3\text{O}_8$  was added to  
19 60 ml of distilled water and stirred for 1 h until completely dissolved. Then, 0.2835g of  
20  $\text{H}_2\text{C}_2\text{O}_4 \cdot 2\text{H}_2\text{O}$  was added to the solution, and stirred until completely dissolved, and  
21 then 5 ml of ethylene glycol solution was added. After that, the whole solution was  
22 transferred to a 100 mL PTFE-lined stainless-steel autoclave for a 24-hour reaction at

1 180 °C. The powders were collected by centrifugation and washed 3 times with distilled  
2 water and absolute ethanol, and dried overnight in a vacuum oven at 60 °C.

3

4 *Synthesis of K,EG-NVO*: The K,EG-intercalated  $\text{NH}_4\text{V}_4\text{O}_{10}$  was synthesized by a  
5 simple one-step hydrothermal reaction. In typical synthesis, 0.354 g  $\text{NH}_4\text{VO}_3$  was  
6 added to 60 ml of distilled water and stirred for 1 h until completely dissolved. Then,  
7 0.2835 g of  $\text{H}_2\text{C}_2\text{O}_4 \cdot 2\text{H}_2\text{O}$  was added to the solution, and stirred until completely  
8 dissolved, and then 0.15 mmol of potassium sulfate and 5 ml of ethylene glycol solution  
9 were added. After that, the whole solution was transferred to a 100 mL PTFE-lined  
10 stainless-steel autoclave for a 24-hour reaction at 180 °C. The powders were collected  
11 by centrifugation and washed 3 times with distilled water and absolute ethanol, and  
12 dried overnight in a vacuum oven at 60 °C.

13

14 *Synthesis of NVO*: The synthesis procedure of  $\text{NH}_4\text{V}_4\text{O}_{10}$  was similar to that of K-NVO,  
15 except the removal of  $\text{K}^+$ .

16

17 *Material Characterizations*: The crystal structure of the samples was characterized by  
18 X-ray diffraction (XRD, Miniflex, Rigaku with Cu  $\text{K}\alpha$ ). The micromorphology of the  
19 samples was observed by scanning electron microscopy (SEM, zeiss/sigma500). The  
20 transmission electron microscopy (TEM) and the high-resolution transmission electron  
21 microscopy (HRTEM) images were obtained using a transmission electron microscope  
22 (JEOL JEM-2100 F). The chemical compositions and bonds of the materials were

1 determined by X-ray photoelectron spectroscopy (XPS, Thermo Scientific K-Alpha+).  
2 Fourier-transform infrared (FT-IR) spectroscopy measurements were carried out by  
3 Bruker Vertex 70 spectrometer. Raman spectra were collected with a Renishaw in a  
4 spectrometer. Electron Paramagnetic Resonance (EPR) spectra were collected by a  
5 Bruker A300 EPR Spectrometer. Contact angles were carried out by Shanghai  
6 Xuanzhun SZ-CAMC32. Ultraviolet photoelectron spectroscopy (UPS) spectra were  
7 collected by Thermo Fisher Scientific Nexsa.

8

9 *Electrochemical Tests:* Electrochemical measurements were performed on CR2032-  
10 type coin cells. The working electrode was prepared by mixing electrode, acetylene  
11 black and polyvinylidene difluoride (PVDF) in an N-methyl-pyrrolidone solvent at a  
12 ratio of 7:2:1 wt % and the slurry was coated on a titanium foil. The electrode was dried  
13 at 70°C in a vacuum oven overnight. The mass loading of the cathode material was ~ 1  
14 mg cm<sup>-2</sup>. A glass fiber (Whatman, GF/D) and 2.0 M Zn(CF<sub>3</sub>SO<sub>3</sub>)<sub>2</sub> were utilized as the  
15 separator and electrolyte, respectively. The galvanostatic intermittent titration  
16 technique (GITT) and the Galvanostatic charge-discharge tests were carried out  
17 utilizing an automatic battery tester (LAND, CT2100A, China) in the voltage range of  
18 0.3–1.6 V (vs Zn<sup>2+</sup>/Zn). Cyclic voltammetry (CV) was conducted on an electrochemical  
19 workstation (CHI760E, China).

20

## 21 **Measurements of Galvanostatic Intermittent Titration Technique (GITT)**

22 The GITT test was performed at 0.1 A g<sup>-1</sup>, which consisted of 5 min galvanostatic

1 charge (pulse) followed by a relaxation time of 10 min. The obtained GITT curves can  
2 be used to determine the zinc ion diffusion coefficients based on the following equation:

$$D = \frac{4L^2}{\pi\tau} \left( \frac{\Delta E_s}{\Delta E_t} \right)^2 \quad (\text{S1})$$

3  
4 where  $D$  is the diffusion coefficient,  $L$  is the diffusion length of  $\text{Zn}^{2+}$ , corresponding to  
5 the thickness of the electrode,  $\tau$  represents the duration of current relaxation time, and  
6  $\Delta E_s$  and  $\Delta E_t$  correspond to the steady-state potential change by the current pulse and  
7 voltage change under the constant current pulse, respectively. The  $\Delta E_s$  and  $\Delta E_t$  can be  
8 read and calculated by the LAND automatic battery tester.

9

## 10 **Computational Methods**

11 All of the spin-polarized density functional theory (DFT) calculations were carried out  
12 under the Device Studio platform using a first-principles calculations software (DS-  
13 PAW) [1], which uses the plane wave basis and the projector augmented wave (PAW)  
14 [2-4] for the treatment of core electrons. The Perdew, Burke, and Ernzerhof exchange-  
15 correlation functional within a generalized gradient approximation (GGA-PBE) [5] was  
16 used in our calculation and added van der Waals (vdW) correction. A supercell  
17 ( $\text{N}_6\text{H}_{24}\text{V}_{24}\text{O}_{60}$ ) was constructed to model  $\text{NH}_4\text{V}_4\text{O}_{10}$ , with the introduction of potassium  
18 atoms and  $\text{C}_2\text{H}_6\text{O}_2$  molecules to create three intercalation-modified models. In all  
19 calculations, a kinetic energy cutoff of 500 eV was adopted, and the Brillouin zone  
20 integration was performed on the  $(3 \times 3 \times 4)$  Monkhorst–Pack k-point mesh. The DFT+U  
21 method was employed to correct the localized 3d electrons of V with a U of 4.0 eV[6].  
22 During geometry optimizations, all the structures were relaxed until the residual atomic

1 forces were less than  $0.02 \text{ eV/\AA}$ , ensuring convergence of the total energy to  $10^{-6} \text{ eV}$ .

2 The ionic convergence criterion for the force on each image during NEB calculations

3 was set to  $0.05 \text{ eV/\AA}$ .

4

5

6

7

8

9

10

11

12

13

14

15

16

17

18

19

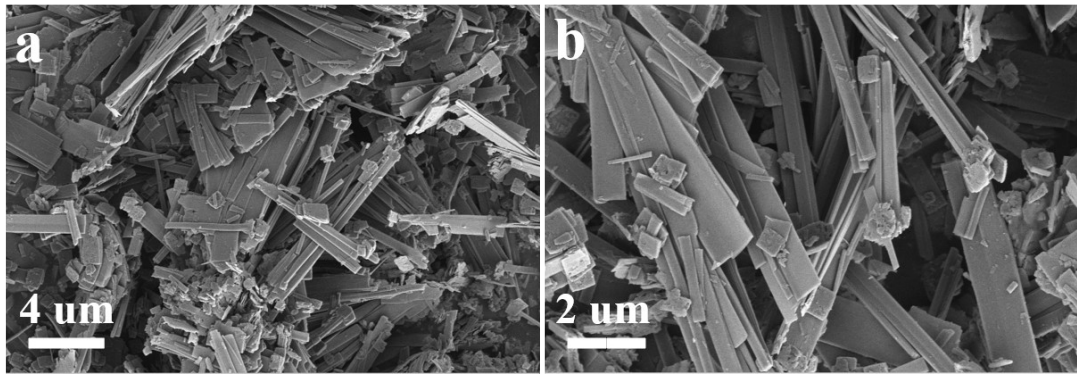

1

2

**Figure S1.** (a, b) SEM images of NVO.

3

4

5

6

7

8

9

10

11

12

13

14

15

16

17

18

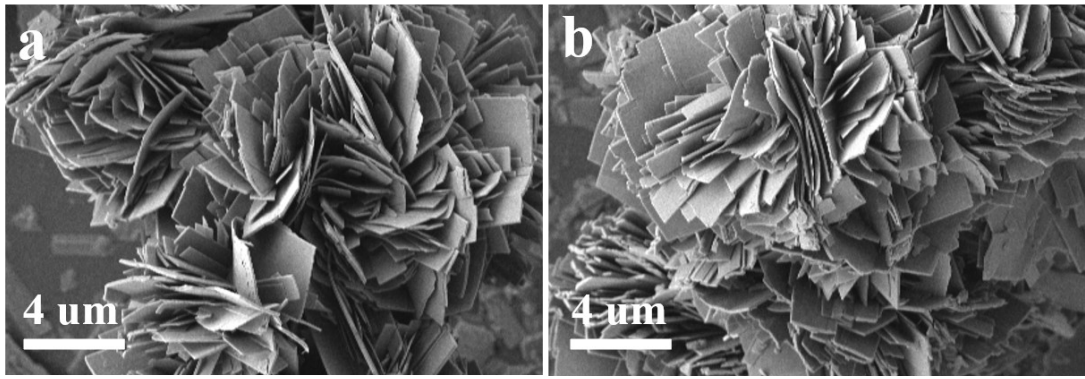

1

2

**Figure S2.** (a, b) SEM images of K-NVO.

3

4

5

6

7

8

9

10

11

12

13

14

15

16

17

18



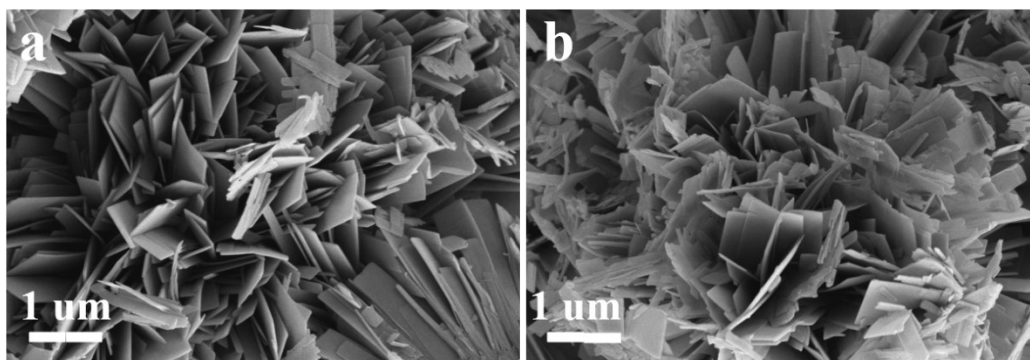

1

2

**Figure S3.** (a, b) SEM images of EG-NVO.

3

4

5

6

7

8

9

10

11

12

13

14

15

16

17

18

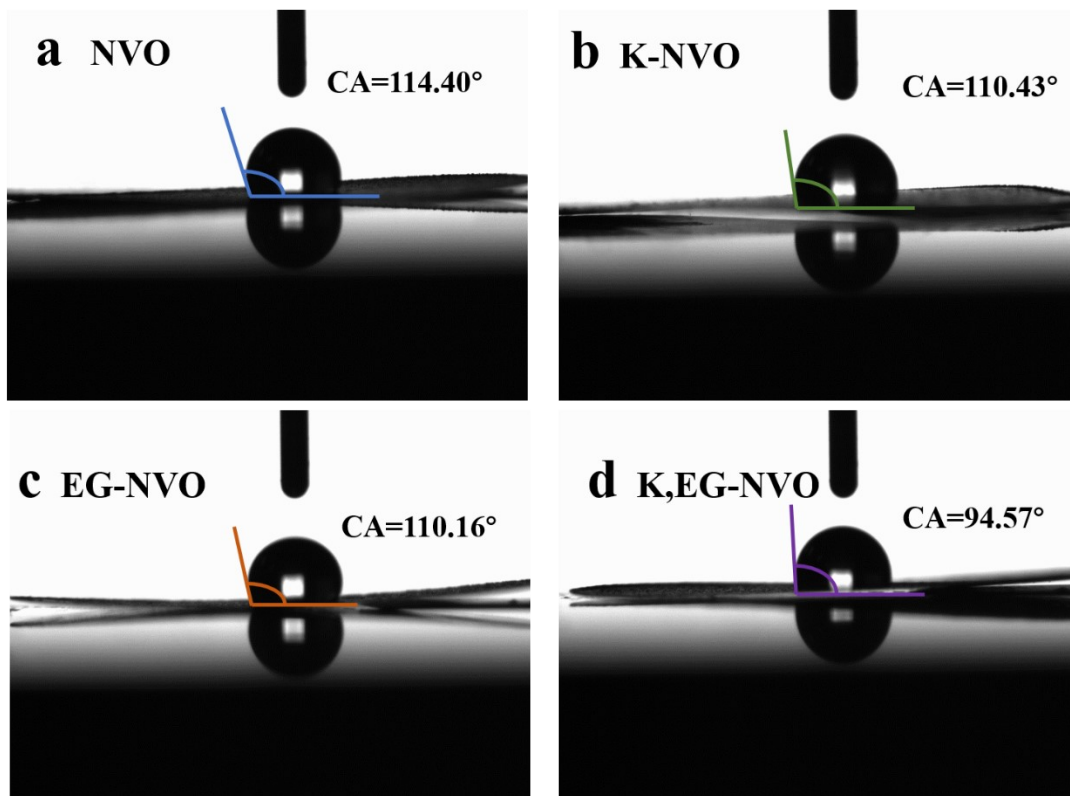

1

2 **Figure S4.** Contact angle of electrolyte with (a) NVO, (b) K-NVO, (c) EG-NVO and

3 (d) K, EG-NVO electrode

4

5

6

7

8

9

10

11

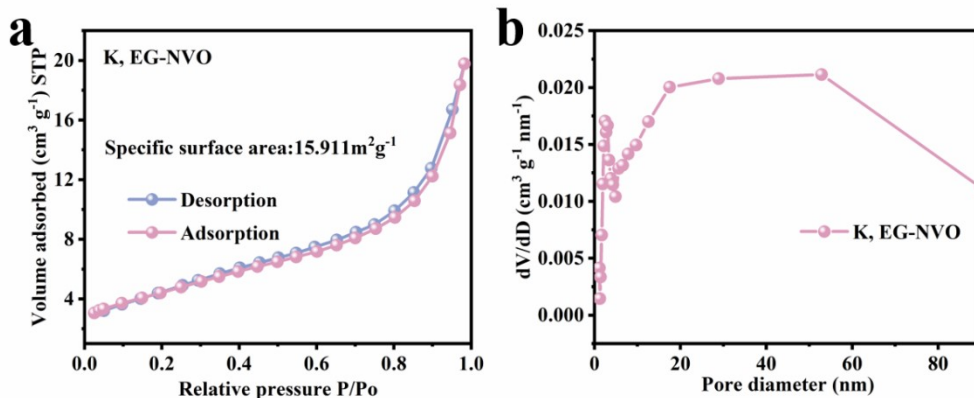

1

2 **Figure S5.** (a)  $\text{N}_2$  adsorption/desorption isotherm, and (b) the corresponding pore size

3

distribution of K, EG-NVO.

4

5

6

7

8

9

10

11

12

13

14

15

16

17

18

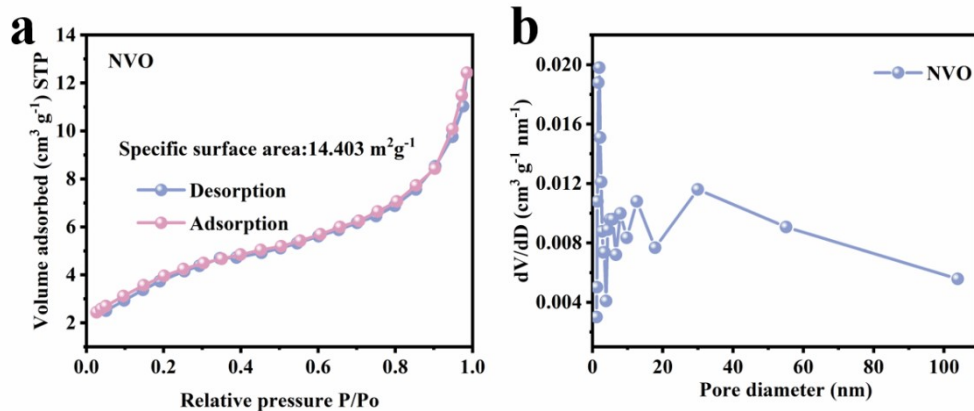

1

2 **Figure S6.** (a)  $\text{N}_2$  adsorption/desorption isotherm, and (b) the corresponding pore size

3

distribution of NVO.

4

5

6

7

8

9

10

11

12

13

14

15

16

17

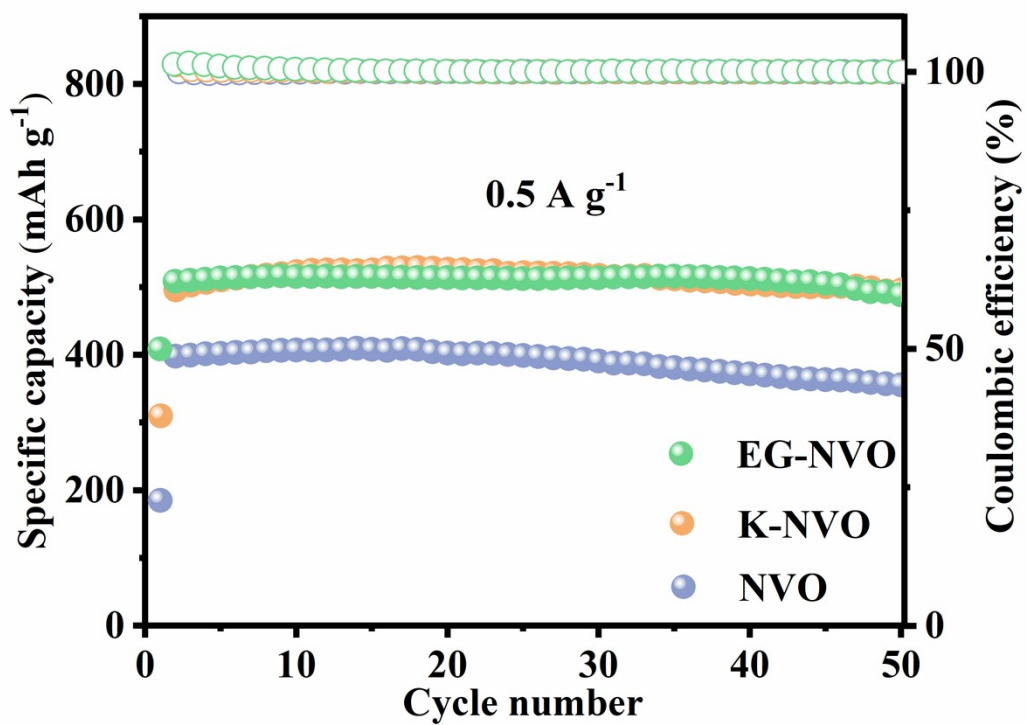

1

2 **Figure S7.** Cycling performance of NVO, K-NVO and EG-NVO at 0.5 A g<sup>-1</sup>.

3

4

5

6

7

8

9

10

11

12

13

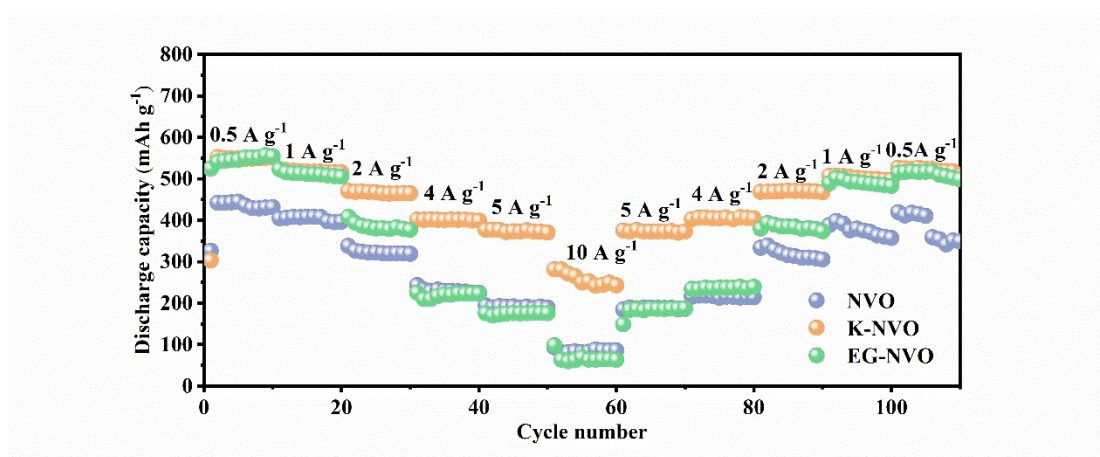

1

2

**Figure S8.** Rate performance of NVO, K-NVO and EG-NVO electrodes.

3

4

5

6

7

8

9

10

11

12

13

14

15

16

17

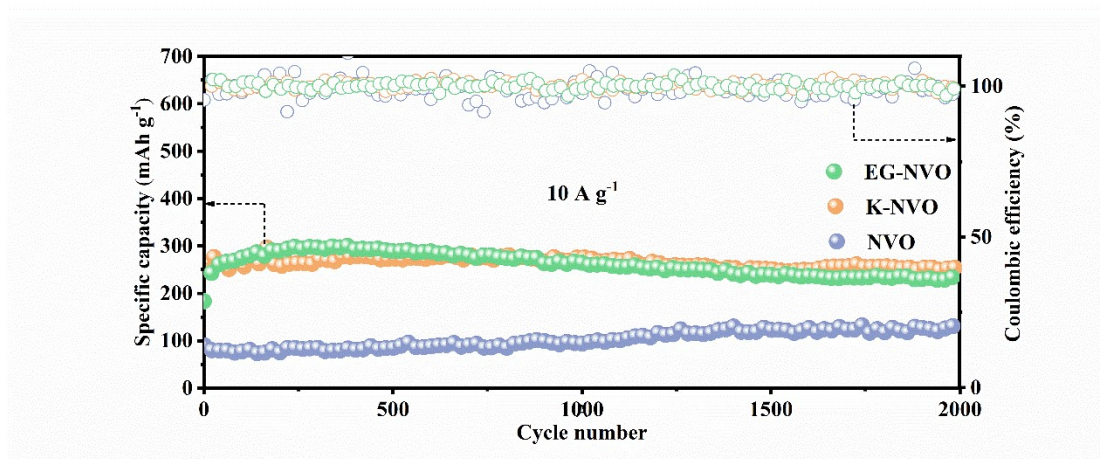

1

2 **Figure S9.** Cycling performance of NVO, K-NVO and EG-NVO at 10 A g<sup>-1</sup>.

3

4

5

6

7

8

9

10

11

12

13

14

15

16

17

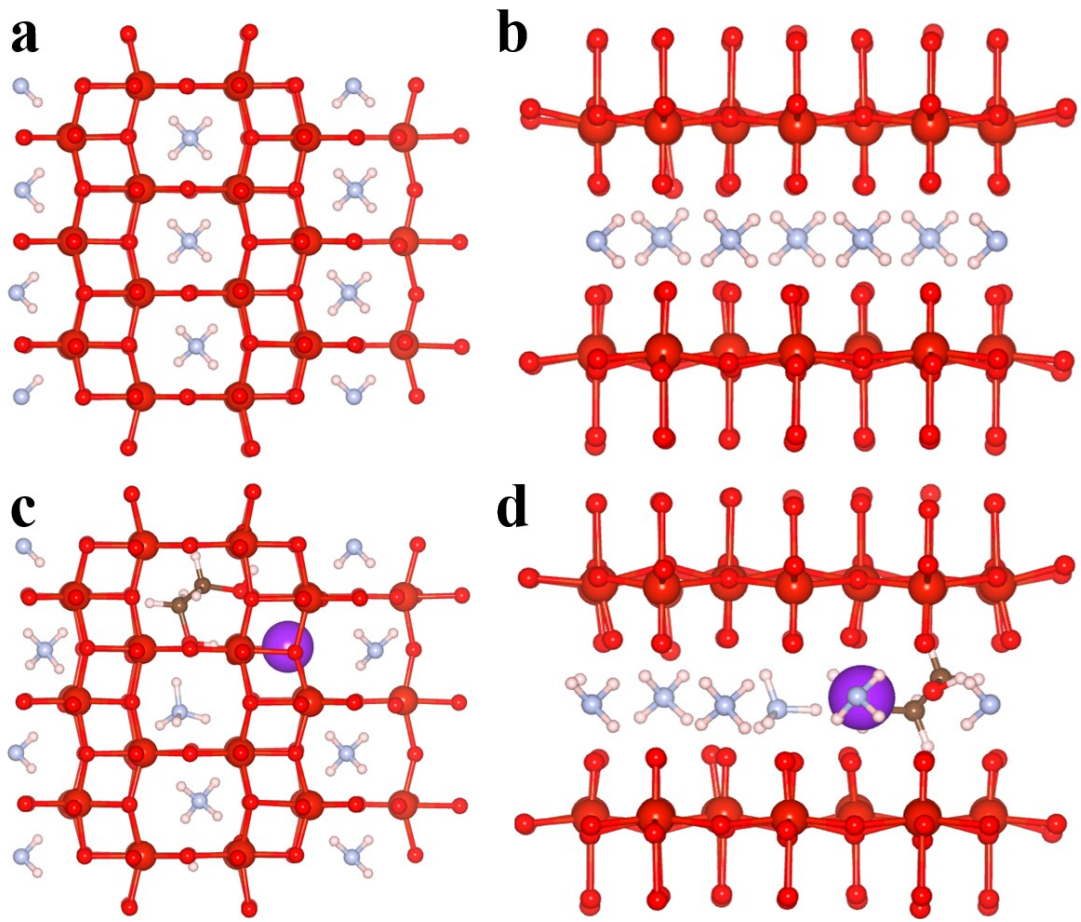

1  
2  
3  
4  
5  
6  
7  
8  
9  
10  
11  
12

**Figure S10.** Geometric structures of (a, b) NVO and (c, d) K, EG-NVO.



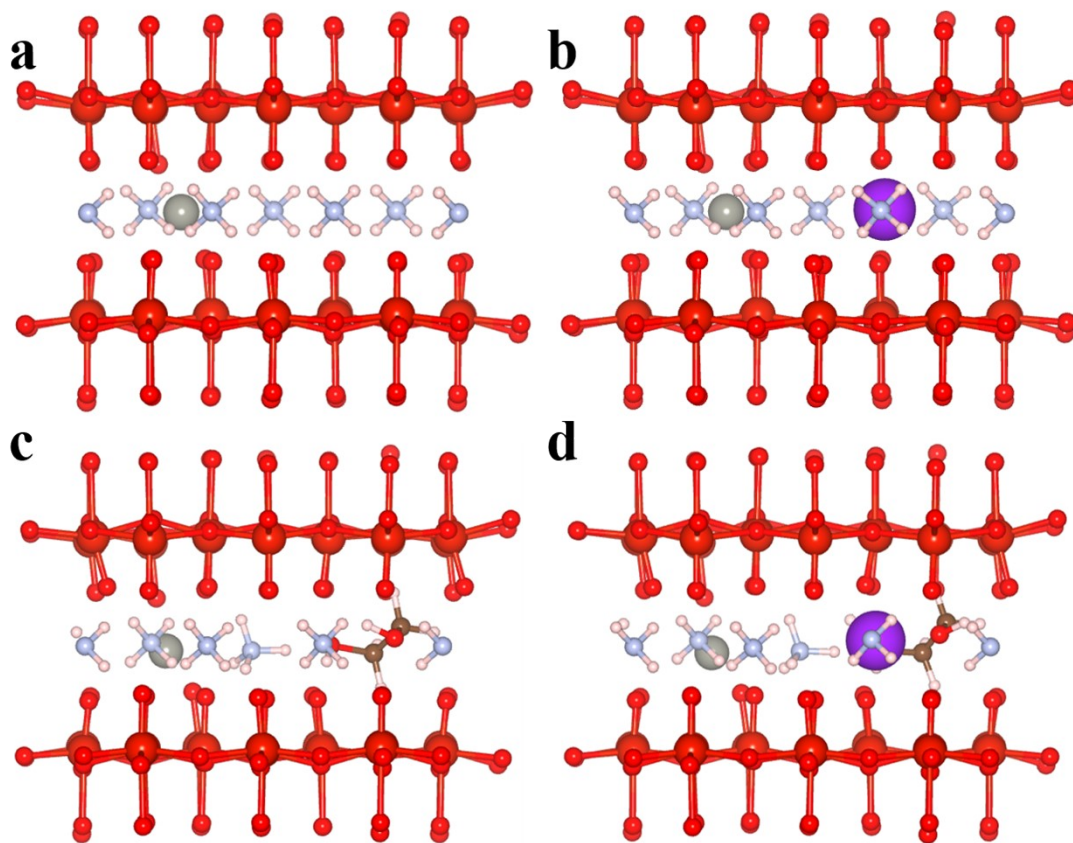

1

2 **Figure S11.** Geometric structures of (a) NVO, (b) K-NVO, (c) EG-NVO, and (d) K,

3

EG-NVO with inserted zinc ions.

4

5

6

7

8

9

10

11

12

13

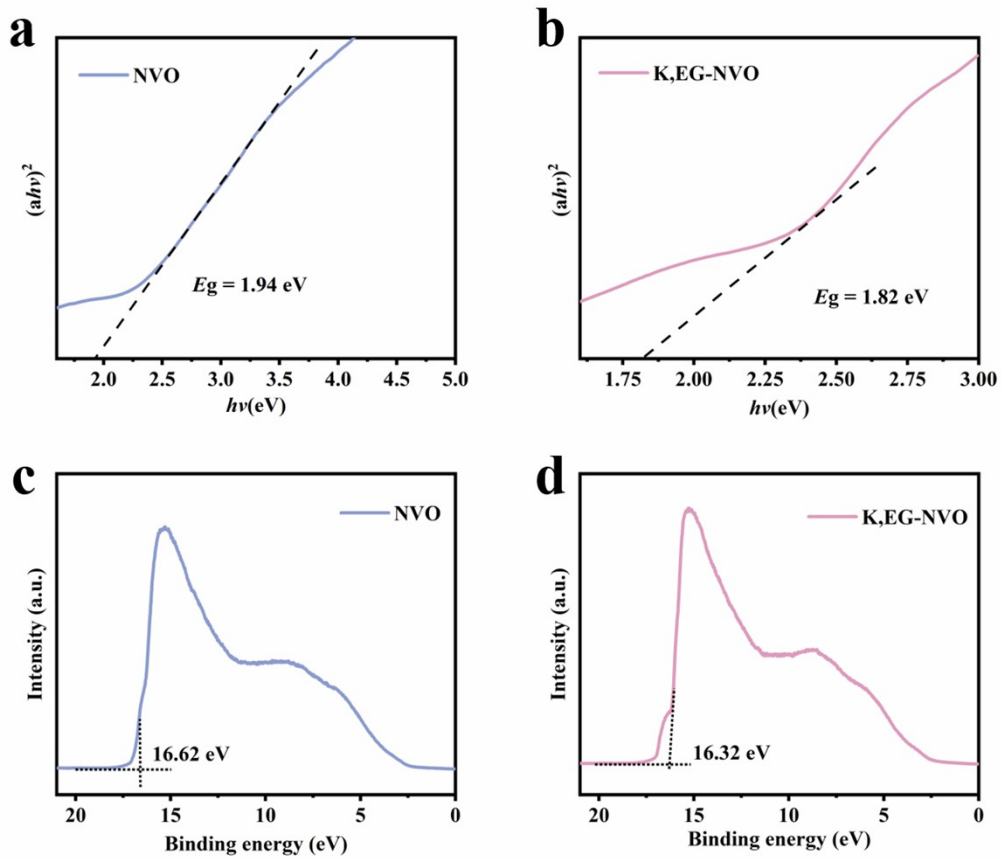

1

2 **Figure S12.** Tauc plots of UV-vis absorption spectra for (a) NVO and (b) K, EG-NVO;

3 UPS spectra of (c) NVO and (d) K, EG-NVO.

4

5

6

7

8

9

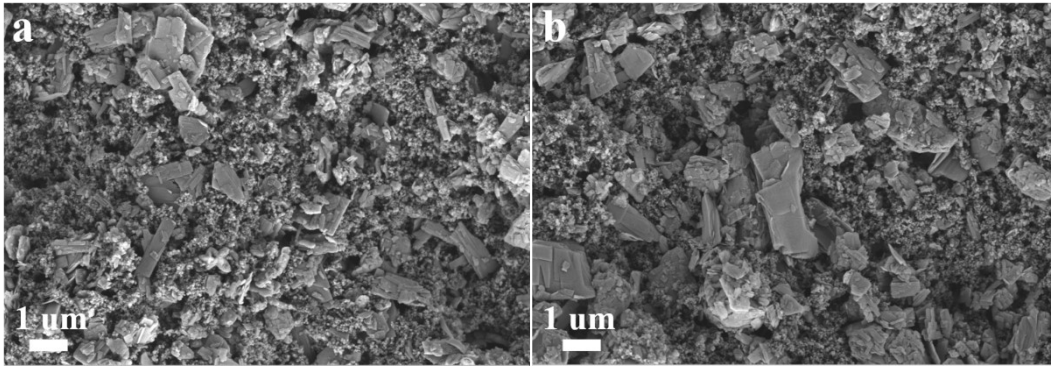

1

2 **Figure S13.** (a, b) SEM images of K, EG-NVO electrode before cycling.

3

4

5

6

7

8

9

10

11

12

13

14

15

16

17

18

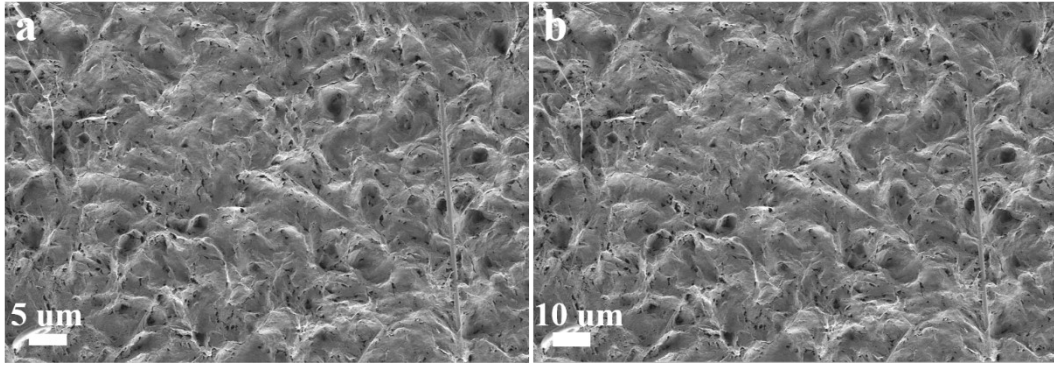

1

2 **Figure S14.** (a, b) SEM images of K, EG-NVO electrode discharged to 0.3 V for the  
3 first time.

4

5

6

7

8

9

10

11

12

13

14

15

16

17

18

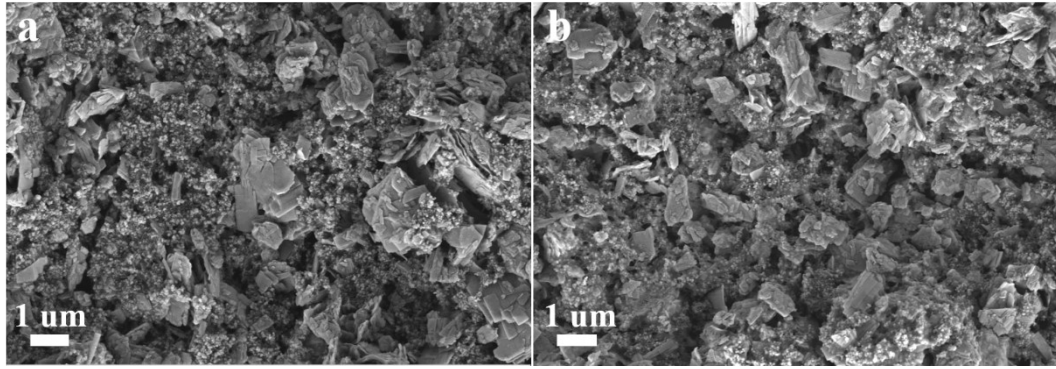

1

2 **Figure S15.** (a, b) SEM images of K, EG-NVO electrode charged to 1.6 V for the first  
3 time.

4

5

6

7

8

9

10

11

12

13

14

15

16

17

18

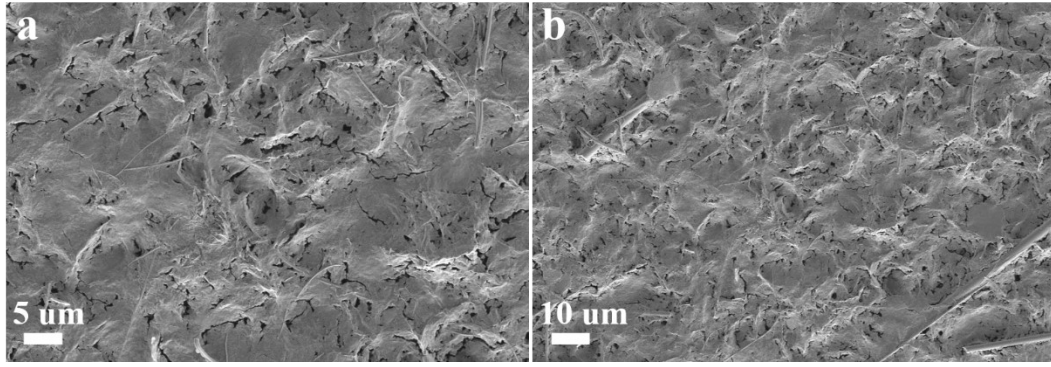

1  
2 **Figure S16.** (a, b) SEM images of K, EG-NVO electrode at the 2<sup>nd</sup> discharge to 0.3 V.

3

4

5

6

7

8

9

10

11

12

13

14

15

16

17

18

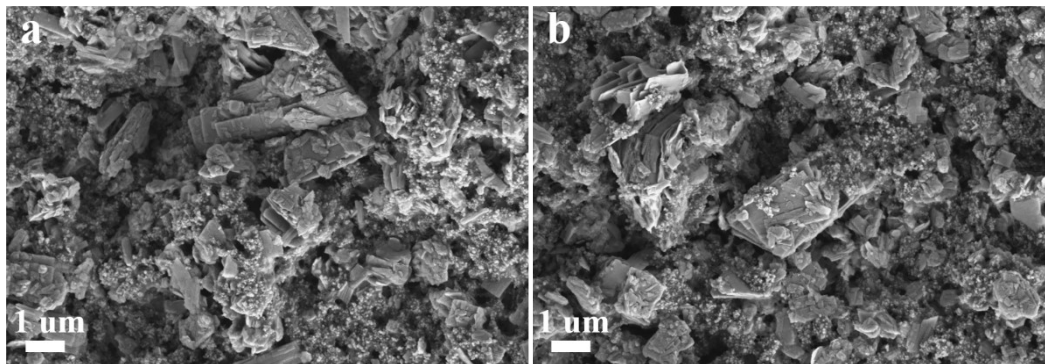

1

2 **Figure S17.** (a, b) SEM images of K, EG-NVO electrode at the 2<sup>nd</sup> charge to 1.6 V.

3

4

5

6

7

8

9

10

11

12

13

14

15

16

17

18

1 **Table S1** Contents of K and V in K-NVO and K,EG-NVO samples by ICP.

| Sample   | Element | Elemental concentration (mg/kg) | Elemental concentration (mol/kg) | Chemical formula            |
|----------|---------|---------------------------------|----------------------------------|-----------------------------|
| K-NVO    | V       | 5758390                         | 112.9                            | $K_{0.18}NH_4V_4O_{10}$     |
|          | K       | 22079                           | 5.09                             |                             |
| K,EG-NVO | V       | 5318520                         | 104.3                            | $EG-K_{0.175}NH_4V_4O_{10}$ |
|          | K       | 19837                           | 4.57                             |                             |

2

3

4

5

6

7

8

9

10

11

12

13

14

15

16



1 **Table S2.** Composition of NVO-based samples with different amounts of structural  
2 water by thermogravimetric analysis.

| Sample    | Initial (ug) | 100 °C (ug) | wt %  |
|-----------|--------------|-------------|-------|
| NVO       | 5310.85      | 5147.00     | 3.07% |
| K-NVO     | 5736.14      | 5570.89     | 2.89% |
| EG-NVO    | 5612.61      | 5224.17     | 6.91% |
| K, EG-NVO | 5685.79      | 5446.37     | 4.2%  |

3

4

5

6

7

8

9

10

11

12

13

14

15

16

17

1 **Table S3.** Contents of EG in EG-NVO and K, EG-NVO samples by elemental  
2 analysis.

| Sample    | C (wt%) | EG (wt%) | N (wt%) | H (wt%) |
|-----------|---------|----------|---------|---------|
| EG-NVO    | 1.80%   | 4.65%    | 2.52%   | 1.38%   |
| K, EG-NVO | 0.35%   | 0.90%    | 1.83%   | 1.23%   |

3

4

5

6

7

8

9

10

11

12

13

14

15

16

17

18

19

1

2 **Table S4.** Comparison of electrochemical performance between this work and the  
 3 state-of-the-art investigations on AZIBs.

| Cathode                                                         | Voltage Window (V) | Electrolyte                                              | Specific capacity                                     | Ref. |
|-----------------------------------------------------------------|--------------------|----------------------------------------------------------|-------------------------------------------------------|------|
| Mg-NH <sub>4</sub> V <sub>4</sub> O <sub>10</sub>               | 0.2-1.6            | 3 M<br>Zn(CF <sub>3</sub> SO <sub>3</sub> ) <sub>2</sub> | 410 mAh g <sup>-1</sup> at<br>0.1 A g <sup>-1</sup>   | [7]  |
| NaNVO-PANI                                                      | 0.2-1.6            | 2 M<br>Zn(CF <sub>3</sub> SO <sub>3</sub> ) <sub>2</sub> | 617 mAh g <sup>-1</sup> at<br>0.5 A g <sup>-1</sup>   | [8]  |
| δ-K <sub>0.49</sub> V <sub>2</sub> O <sub>5</sub>               | 0.3-1.5            | 3 M<br>Zn(CF <sub>3</sub> SO <sub>3</sub> ) <sub>2</sub> | 361 mAh g <sup>-1</sup> at<br>0.2 A g <sup>-1</sup>   | [9]  |
| (1Zn,1ch)-VOH                                                   | 0.2-1.6            | 3 M<br>Zn(CF <sub>3</sub> SO <sub>3</sub> ) <sub>2</sub> | 424 mAh g <sup>-1</sup> at<br>0.5 A g <sup>-1</sup>   | [10] |
| NiVO-BTA                                                        | 0.3-1.4            | 3 M<br>Zn(CF <sub>3</sub> SO <sub>3</sub> ) <sub>2</sub> | 464.2 mAh g <sup>-1</sup> at<br>0.2 A g <sup>-1</sup> | [11] |
| CS@ZVO                                                          | 0.3-1.7            | 3 M<br>Zn(CF <sub>3</sub> SO <sub>3</sub> ) <sub>2</sub> | 323 mAh g <sup>-1</sup> at<br>0.1 A g <sup>-1</sup>   | [12] |
| α-V <sub>2</sub> O <sub>5</sub> @V <sub>2</sub> CT <sub>x</sub> | 0.2-1.8            | 3 M<br>Zn(CF <sub>3</sub> SO <sub>3</sub> ) <sub>2</sub> | 595.2 mAh g <sup>-1</sup> at<br>0.2 A g <sup>-1</sup> | [13] |
| AVO                                                             | 0.2-1.6            | 3 M<br>Zn(CF <sub>3</sub> SO <sub>3</sub> ) <sub>2</sub> | 427 mAh g <sup>-1</sup> at<br>0.2 A g <sup>-1</sup>   | [14] |
| PEO-LVO                                                         | 0.2-1.6            | 3 M<br>Zn(CF <sub>3</sub> SO <sub>3</sub> ) <sub>2</sub> | 438.1 mAh g <sup>-1</sup> at<br>0.1 A g <sup>-1</sup> | [15] |
| ZVO                                                             | 0.3-1.6            | 3 M<br>Zn(CF <sub>3</sub> SO <sub>3</sub> ) <sub>2</sub> | 426.3 mAh g <sup>-1</sup> at<br>0.2 A g <sup>-1</sup> | [16] |

---

|           |         |                                                          |                                                     |              |
|-----------|---------|----------------------------------------------------------|-----------------------------------------------------|--------------|
| K, EG-NVO | 0.3-1.6 | 2 M<br>Zn(CF <sub>3</sub> SO <sub>3</sub> ) <sub>2</sub> | 604 mAh g <sup>-1</sup> at<br>0.5 A g <sup>-1</sup> | This<br>work |
|-----------|---------|----------------------------------------------------------|-----------------------------------------------------|--------------|

---

## 1 References

- 2 [1] P.E. Blöchl, Projector augmented-wave method, *Phys. Rev. B.* 1994, **50**, 17953-  
3 17979.
- 4 [2] G. Kresse, J. Furthmuller, Efficient iterative schemes for ab initio total-energy  
5 calculations using a plane-wave basis set, *Phys. Rev. B.* 1996, **54**, 11169.
- 6 [3] G. Kresse, Furthmuller, J, Efficiency of ab-initio total energy calculations for  
7 metals and semiconductors using a plane-wave basis set *Comput. Mater. Sci.* 1996, **6**,  
8 15.
- 9 [4] G. Kresse, D. Joubert, From ultrasoft pseudopotentials to the projector augmented-  
10 wave method, *Phys. Rev. B.* 1999, **59**, 1758-1775.
- 11 [5] J.P. Perdew, K. Burke, M. Ernzerhof, Generalized Gradient Approximation Made  
12 Simple, *Phys rev lett.* 1996, **77**, 3865-3868.
- 13 [6] S.L. Dudarev, G.A. Botton, S.Y. Savrasov, C.J. Humphreys, A.P. Sutton, Electron-  
14 energy-loss spectra and the structural stability of nickel oxide: An LSDA1U study,  
15 *Phys. Rev. B.* 1998, **57**, 1505.
- 16 [7] X. Wang, Y. Wang, A. Naveed, G. Li, H. Zhang, Y. Zhou, A. Dou, M. Su, Y. Liu,  
17 R. Guo, C.C. Li, Magnesium Ion Doping and Micro-Structural Engineering Assist  
18 NH<sub>4</sub>V<sub>4</sub>O<sub>10</sub> as a High-Performance Aqueous Zinc Ion Battery Cathode, *Adv. Funct.*  
19 *Mater.* 2023, **33**, 2306205.
- 20 [8] S. Zhao, S. Wang, J. Guo, L. Li, C. Li, Y. Sun, P. Xue, D. Wu, L. Wei, Y. Wang,

1 Q. Zhang, Sodium-Ion and Polyaniline Co-Intercalation into Ammonium Vanadate  
2 Nanoarrays Induced Enlarged Interlayer Spacing as High-Capacity and Stable  
3 Cathodes for Flexible Aqueous Zinc-Ion Batteries, *Adv. Funct. Mater.* 2023, **33**,  
4 2305700.

5 [9] W. He, C. Meng, Z. Ai, D. Xu, S. Liu, Y. Shao, Y. Wu, X. Hao, Achieving fast ion  
6 diffusion in aqueous zinc-ion batteries by cathode reconstruction design, *Chem. Eng. J.*  
7 2023, **454**, 140260.

8 [10] Q. Zong, Y. Zhuang, C. Liu, Q. Kang, Y. Wu, J. Zhang, J. Wang, D. Tao, Q. Zhang,  
9 G. Cao, Dual Effects of Metal and Organic Ions Co-Intercalation Boosting the Kinetics  
10 and Stability of Hydrated Vanadate Cathodes for Aqueous Zinc-Ion Batteries, *Adv.*  
11 *Energy Mater.* 2023, **13**, 2301480.

12 [11] J. Guo, J. Liu, W. Ma, Z. Sang, L. Yin, X. Zhang, H. Chen, J. Liang, D.a. Yang,  
13 Vanadium Oxide Intercalated with Conductive Metal–Organic Frameworks with Dual  
14 Energy-Storage Mechanism for High Capacity and High-Rate Capability Zn Ion  
15 Storage, *Adv. Funct. Mater.* 2023, **33**, 2302659.

16 [12] J. Yang, J. Li, Y. Li, Z. Wang, L. Ma, W. Mai, M. Xu, L. Pan, Defect regulation  
17 in bimetallic oxide cathodes for significantly improving the performance of flexible  
18 aqueous Zn-ion batteries, *Chem. Eng. J.* 2023, **468**, 143600.

19 [13] W. Wang, R. Hu, C. Zhang, Y. Tao, L. Ran, Y. Li, Y. Ouyang, J. Yan, A stepwise  
20 oxidation strategy for the synthesis of amorphous  $V_2O_5@V_2CT_x$  nanohybrid cathodes  
21 toward high-performance aqueous Zn-ion batteries, *J Mater Chem A.* 2023, **11**, 8224-  
22 8234.

- 1 [14] W. Deng, Z. Xu, G. Li, X. Wang, Self-Transformation Strategy Toward Vanadium  
2 Dioxide Cathode For Advanced Aqueous Zinc Batteries, *Small* 2023, **19**, 2207754.
- 3 [15] M. Wu, C. Shi, J. Yang, Y. Zong, Y. Chen, Z. Ren, Y. Zhao, Z. Li, W. Zhang, L.  
4 Wang, X. Huang, W. Wen, X. Li, X. Ning, X. Ren, D. Zhu, The  $\text{LiV}_3\text{O}_8$  Superlattice  
5 Cathode with Optimized Zinc Ion Insertion Chemistry for High Mass-Loading Aqueous  
6 Zinc-Ion Batteries, *Adv Mater* 2024.
- 7 [16] L. Wang, K.-W. Huang, J. Chen, J. Zheng, Ultralong cycle stability of aqueous  
8 zinc-ion batteries with zinc vanadium oxide cathodes, *Sci Adv.* 2019, **5**, eaax4279.
- 9
